# Supplementary material
Source: publisher figshare collection journal article supplement (https://tandf.figshare.com/ndownloader/files/22019517)
Supplement: Supplementary file 1 [file 22019517]

**Supplementary material**

Supplementary Table. Myelin Water Fraction Values for all Regions of Interest.

|  | mTBI  (*n* = 20) | | PTSD  (*n* = 16) | | mTBI+PTSD  (*n* = 22) | | Controls  (*n* = 16) | |
| --- | --- | --- | --- | --- | --- | --- | --- | --- |
| **Region of Interest** | Mean (SD); range | Adj. Mean (SE) | Mean (SD); range | Adj. Mean (SE) | Mean (SD); range | Adj. Mean (SE) | Mean (SD); range | Adj. Mean (SE) |
| Genu CC | .16 (.02); .12-.19 | .16(.004) | .18 (.02); .14-.22 | .17 (.005) | .17 (.03); .13-.22 | .17 (.004) | .17 (.02); .13-.22 | .16 (.005) |
| Body CC | .14 (.02); .11-.18 | .15 (.005) | .17 (.03); .12-.22 | .16 (.006) | .16 (.03); .12-.24 | .17 (.005) | .16 (.03); .13-.23 | .15 (.006) |
| Splenium CC | .15 (.02); .11-.20 | .16 (.005) | .18 (.03); .13-.22 | .17 (.006) | .16 (.04); .11-.24 | .17 (.005) | .17 (.03); .14-.22 | .16 (.006) |
| Anterior Limb IC | .14 (.02); .10-.19 | .15 (.005) | .17 (.03); .11-.22 | .16 (.006) | .16 (.03); .12-.24 | .17 (.005) | .16 (.03); .12-.23 | .15 (.006) |
| Posterior Limb IC | .15 (.02); .11-.19 | .16 (.005) | .18 (.03); .12-.23 | .17 (.006) | .17 (.04); .12-.25 | .18 (.005) | .17 (.03); .13-.24 | .16 (.006) |
| Retrolenticular Limb IC | .16 (.02); .12-.20 | .17 (.005) | .19 (.03); .13-.23 | .18 (.006) | .17 (.04); .13-.25 | .18 (.005) | .18 (.03); .15-.25 | .17 (.006) |
| Cingulum | .13 (.02); .09-.17 | .13 (.005) | .15 (.03); .10-.19 | .14 (.006) | .14 (.04); .09-.22 | .15 (.005) | .14 (.03); .11-.20 | .13 (.006) |

*Notes*: *Adjusted means are controlling for scanner upgrade.

*Abbreviations*: mTBI = mild traumatic brain injury; PTSD = posttraumatic stress disorder; CC = corpus callosum; IC = internal capsule.
